# Supplementary material for: The Effects of PEI Hollow Fiber Substrate Characteristics on PDMS/PEI Hollow Fiber Membranes for CO2/N2 Separation
Source: PubMed Central journal article supplement (PMC7828792; doi:10.3390/membranes11010056), 2021-01-14
Supplement: membranes-11-00056-s001.pdf [file membranes-11-00056-s001.pdf]

*Supporting Information*

# **The Effects of PEI Hollow Fiber Substrate Characteristics on PDMS/PEI Hollow Fiber Membranes for CO<sub>2</sub>/N<sub>2</sub> Separation**

**Guoqiang Li <sup>1</sup>, Wojciech Kujawski <sup>1,2,\*</sup>, Katarzyna Knozowska <sup>1</sup> and Joanna Kujawa <sup>1</sup>**

<sup>1</sup> Faculty of Chemistry, Nicolaus Copernicus University in Toruń, 7, Gagarina Street, 87-100 Toruń, Poland

<sup>2</sup> National Research Nuclear University MEPhI, 31, Kashira Hwy, 115409 Moscow, Russia

\* Correspondence: kujawski@chem.umk.pl; Tel.: +48-566114517

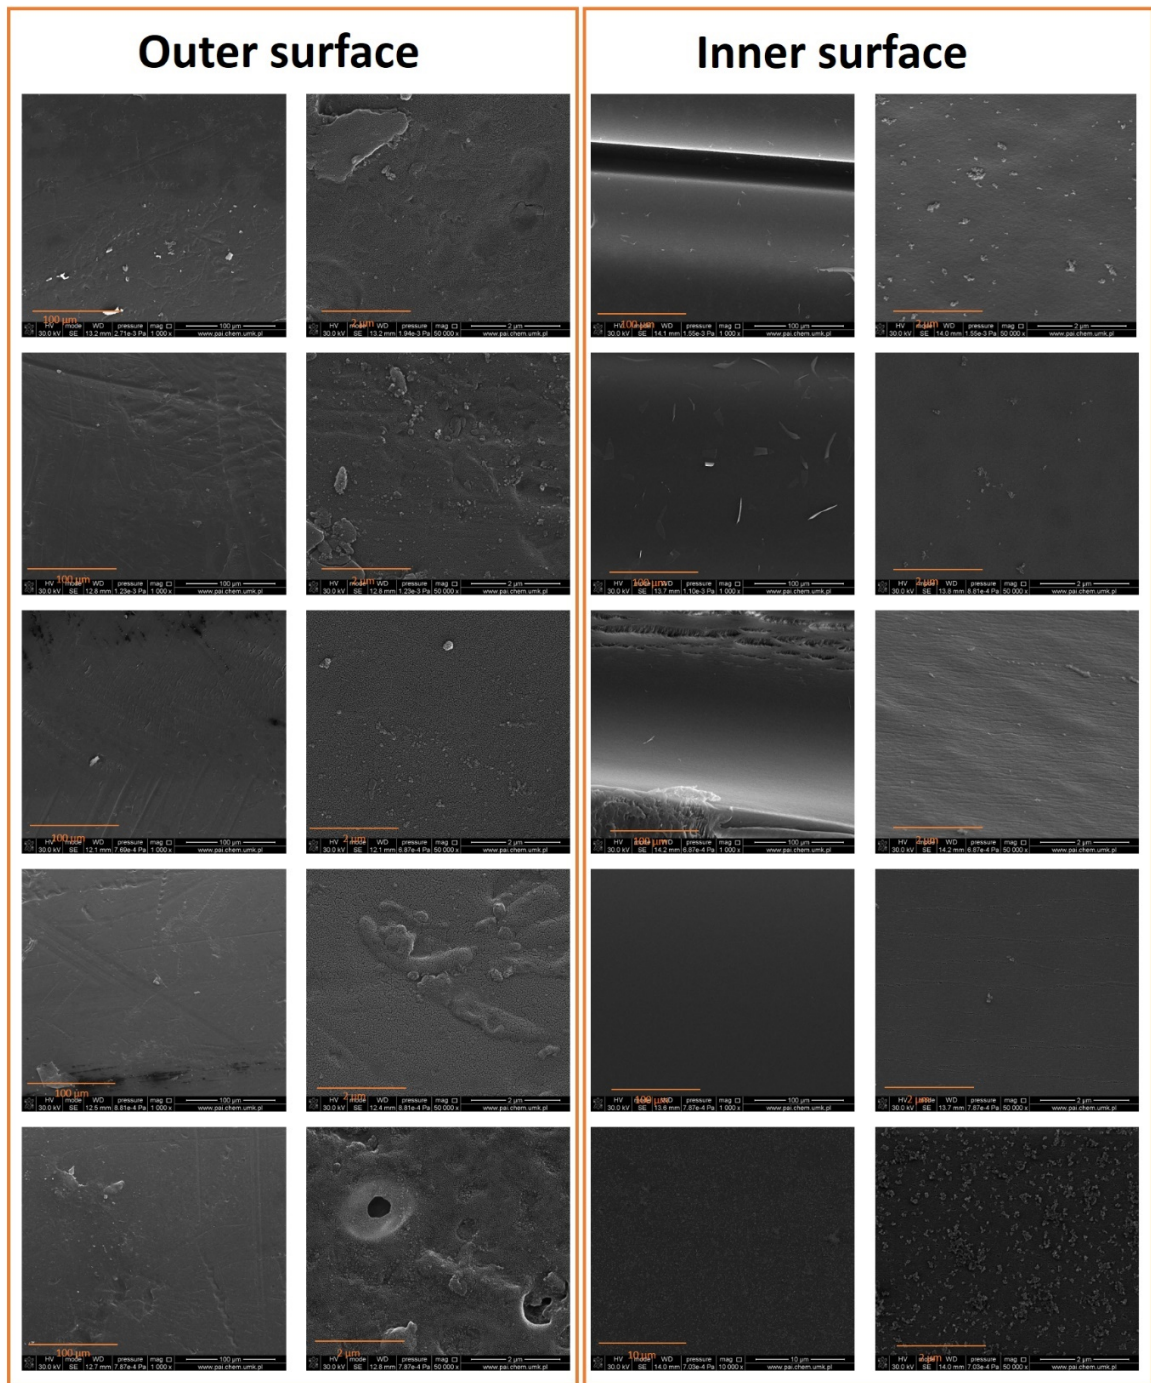

**Figure S1.** SEM micrographs of outer and inner surfaces of PEI hollow fibers spun from different concentrations of polymer solution—(A) HF1—16 wt.%, (B) HF2—18 wt.%, (C) HF3—20 wt.%, (D) HF4—22 wt.%, (E) HF5—24 wt.%.

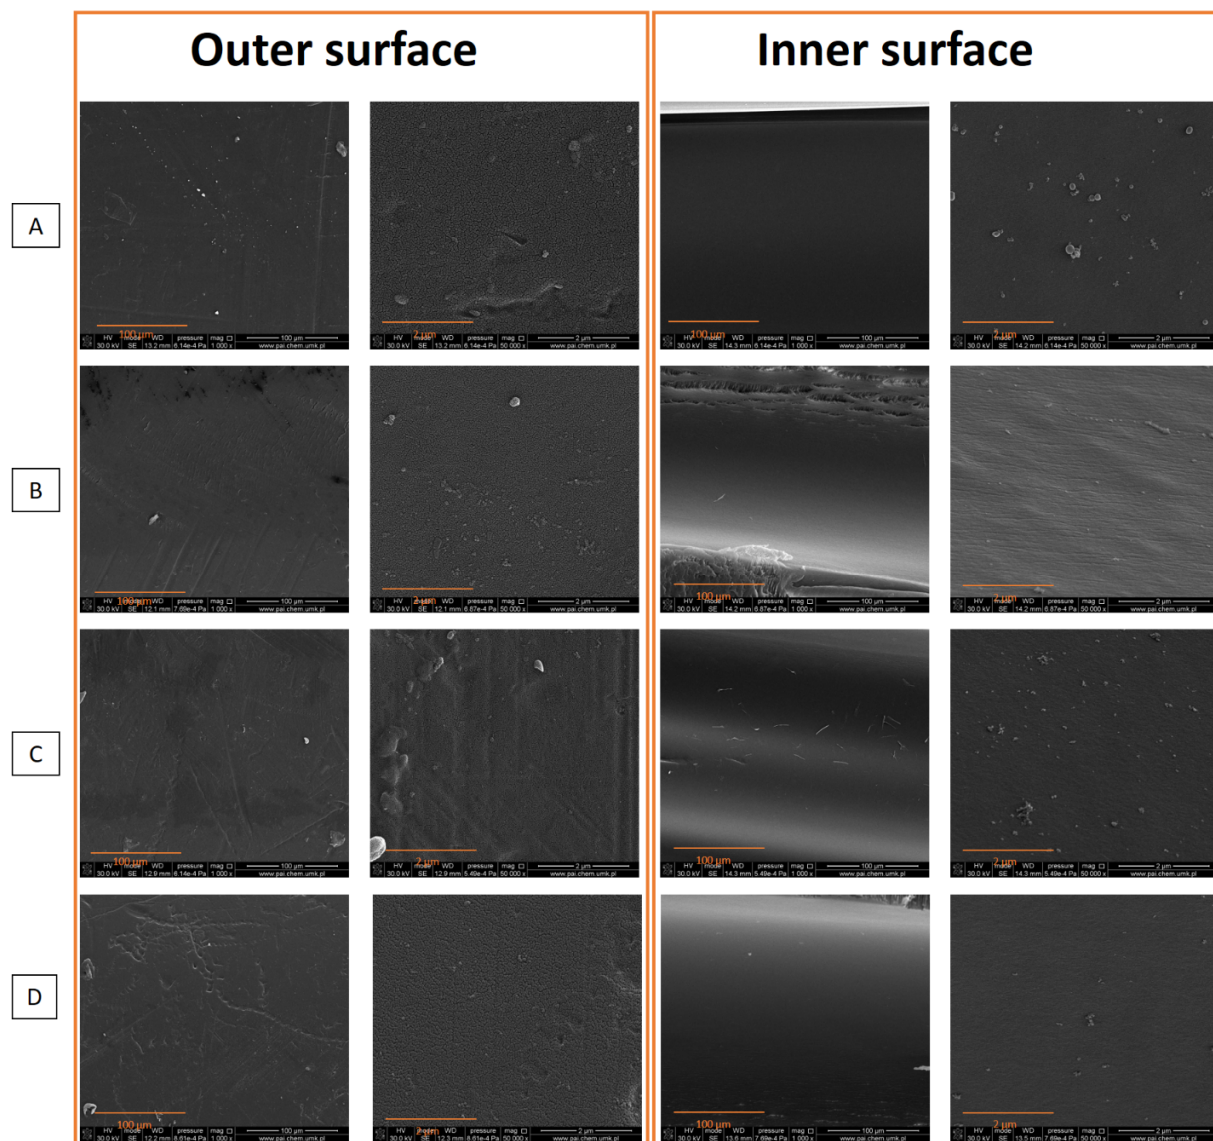

**Figure S2.** SEM micrographs of outer and inner surface of PEI hollow fibers spun at different flow rates of bore fluid. (A) HF3-1—3 cm<sup>3</sup>/min, (B) HF3-2—6 cm<sup>3</sup>/min, (C) HF3-3—9 cm<sup>3</sup>/min, (D) HF3-4—12 cm<sup>3</sup>/min.

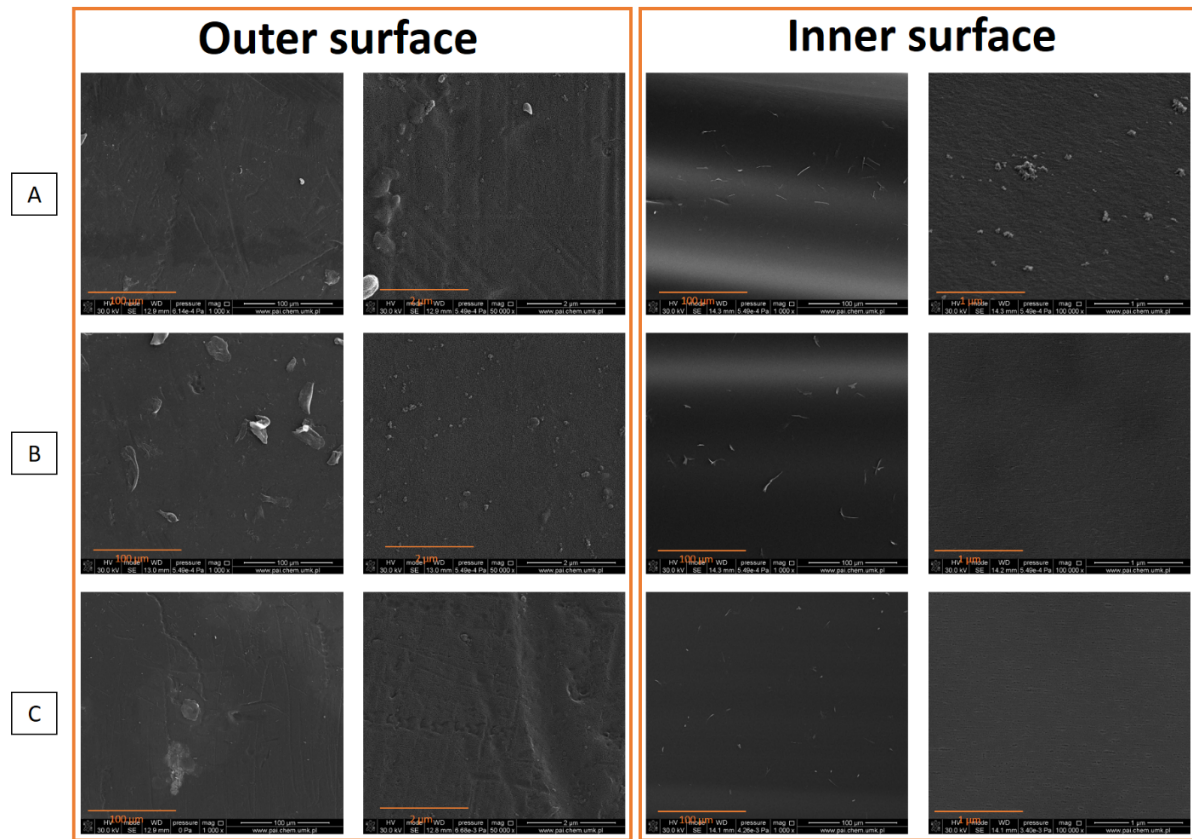

**Figure S3.** SEM micrographs of outer and inner surfaces of PEI hollow fibers spun with different compositions of bore fluid. (A) HF3-3—H<sub>2</sub>O, (B) HF3-5—H<sub>2</sub>O/NMP 50/50 wt.%, (C) HF3-6—H<sub>2</sub>O/NMP 30/70 wt.%.
